# Supplementary material
Source: ML conference proceedings conference paper supplement (https://proceedings.neurips.cc/paper_files/paper/2022/hash/5bd9fbb3a5a985f80c16ddd0ec1dfc43-Abstract.html)
Supplement: Supplementary file 1 [file 5bd9fbb3a5a985f80c16ddd0ec1dfc43-Supplemental-Conference.zip]

Archive with 10 entries (10 files):
- Tensor_differentOrder_tau_Nips22.m
- Tensor_differentOrder_tau_Nips22_Nex.m
- Tensor_differentRank_tau_Nips22.m
- AddingTau.m
- Error_Analysis_of_Tensor_Train_Cross_Approximation_Appendix.pdf
- greedy2_cross_Version_ZhenQin1.m
- README.md
- Tensor_differentApproError_tau_Nips22.m
- Tensor_differentEstimatedRank_tau_Nips22.m
- Tensor_differentMeasurementError_tau_Nips22.m
