# Supplementary material
Source: ML conference proceedings conference paper supplement (https://proceedings.neurips.cc/paper_files/paper/2022/hash/5bd9fbb3a5a985f80c16ddd0ec1dfc43-Abstract.html)
Supplement: Supplementary file 1 [file 5bd9fbb3a5a985f80c16ddd0ec1dfc43-Supplemental-Conference.zip › AddingTau.m]

function [A]=AddingTau(ilocl,ilocr,Tensor,n_TT,r_TT,tau)
Times_n_TT=1;
for i=1:length(n_TT)
    Times_n_TT=Times_n_TT*n_TT(i);
end
A=cell(length(n_TT),1);
for j=1:length(n_TT)
    if j==1
        column_size=Times_n_TT/n_TT(1);
        A_1=reshape(Tensor,[n_TT(1),column_size]);
        C=A_1(ilocl{j+1},ilocr{j+1});
        if tau==0
            C_tau=C;
        else
            [S_B_1_tau,V_B_1_tau,D_B_1_tau]=svd(C);
            for i_1=1:r_TT(j);
                if V_B_1_tau(i_1,i_1)>=tau
                    V_B_1_tau(i_1,i_1)=V_B_1_tau(i_1,i_1);
                else
                    V_B_1_tau(i_1,i_1)=0;
                end
            end
        C_tau=S_B_1_tau*V_B_1_tau*D_B_1_tau.';            
        end
        B=A_1(:,ilocr{j+1})*pinv(C_tau);
        A{j}=B;
    elseif j<length(n_TT)
        column_size=column_size/n_TT(j);
        A_1=reshape(A_1(ilocl{j,1},:),[n_TT(j)*r_TT(j-1),column_size]);
        C=A_1(ilocl{j+1},ilocr{j+1});
        if tau==0
            C_tau=C;
        else
            [S_B_1_tau,V_B_1_tau,D_B_1_tau]=svd(C);
            for i_1=1:r_TT(j);
                if V_B_1_tau(i_1,i_1)>=tau
                    V_B_1_tau(i_1,i_1)=V_B_1_tau(i_1,i_1);
                else
                    V_B_1_tau(i_1,i_1)=0;
                end
            end
        C_tau=S_B_1_tau*V_B_1_tau*D_B_1_tau.';            
        end
        B=A_1(:,ilocr{j+1})*pinv(C_tau);
        A{j}=reshape(B,[r_TT(j-1),n_TT(2),r_TT(j)]);
    elseif j==length(n_TT)
        column_size=column_size/n_TT(j);
        A{j}=A_1(ilocl{j,1},:);
    end
end
% for ii=1:length(n_TT)
% 
% A{1}(1,:)*reshape(A{2}(:,1,:),[r_TT(2),r_TT(3)])*...
% reshape(A{3}(:,1,:),[r_TT(3),r_TT(4)])*reshape(A{4}(:,1,:),[r_TT(4),r_TT(5)])*...
% reshape(A{5}(:,1,:),[r_TT(5),r_TT(6)])*reshape(A{6}(:,1,:),[r_TT(6),r_TT(7)])*...
% reshape(A{7}(:,1,:),[r_TT(7),r_TT(8)])*reshape(A{8}(:,1,:),[r_TT(8),r_TT(9)])*A{9}(:,1);
