# Supplementary material
Source: ML conference proceedings conference paper supplement (https://proceedings.neurips.cc/paper_files/paper/2022/hash/5bd9fbb3a5a985f80c16ddd0ec1dfc43-Abstract.html)
Supplement: Supplementary file 1 [file 5bd9fbb3a5a985f80c16ddd0ec1dfc43-Supplemental-Conference.zip › README.md]

This repository is the official implementation of [Error Analysis of Tensor-Train Cross Approximation]

The first thing you need do is to download "TT_Toolbox" in Matlab


#  Performance of tensor cross approximations for different ranks (Figure 3 (a))

Run the following command with Matlab:

```
Tensor_differentEstimatedRank_tau_Nips22.m
```

#  Performance of tensor cross approximations for different orders (Figure 3 (b))

Run the following command with Matlab:

```
Tensor_differentOrder_tau_Nips22.m
```

#  Performance of tensor cross approximations for different level η and  µ (Figure 3 (c) and Figure 3 (d))

Run the following command with Matlab:

```
Tensor_differentApproError_tau_Nips22.m
Tensor_differentMeasurementError_tau_Nips22.m
```

#  Performance of tensor cross approximations for different rank (Figure 3 (e))

Run the following command with Matlab:

```
Tensor_differentRank_tau_Nips22
```

#  Performance of tensor cross approximations for different orders without approximation error (Figure 4)

Run the following command with Matlab:

```
Tensor_differentOrder_tau_Nips22_Nex
```
