# Supplementary material
Source: ML conference proceedings conference paper supplement (https://proceedings.neurips.cc/paper_files/paper/2022/hash/5bd9fbb3a5a985f80c16ddd0ec1dfc43-Abstract.html)
Supplement: Supplementary file 1 [file 5bd9fbb3a5a985f80c16ddd0ec1dfc43-Supplemental-Conference.zip › Tensor_differentApproError_tau_Nips22.m]

clc;
clear all;
close all;

NumberofIterations=300;
%eta_set=1e-4;
mu_set=1e-7;
%Tau_design=1e-6;
%Length_r_max_design=3;
Length_r_max_1 = 4;
Length_r_max_2 = 5;
Length_r_max_3 = 6;

eta=[1e-7,5e-7,1e-6,5e-6,1e-5,5e-5,1e-4];
Tau_design=[1e-9,5e-9,1e-8,5e-8,1e-7,5e-7,1e-6];
%Tau_design =1e-7;
%% Given a full tensor %Full tensor %10-order

for ii_11=1:NumberofIterations
%
for appeoximate_error = 1:7
n_TT = [2, 2, 2, 2, 2, 2, 2, 2,2,2];%the unmber of n_TT equals to d_TT
d_TT=10;
r_TT=[1,2,2,2,2,2,2,2,2,2,1];
A_low_rank_TT_Tensor=tt_random(n_TT,d_TT,r_TT);
A_low_rank_TT_Tensor_vector=full(A_low_rank_TT_Tensor);
A=reshape(A_low_rank_TT_Tensor_vector,n_TT); %From TT-Tensor to original Tensor
B=reshape(A,[2,2^(d_TT-1)]);
B_value=norm(B,'fro');
A=A/B_value;
%
LowRankError_Tensor=randn(2, 2, 2, 2, 2, 2,2,2,2,2);
C=reshape(LowRankError_Tensor,[2,2^(d_TT-1)]);
C_value=norm(C,'fro');
LowRankError_Tensor=LowRankError_Tensor/C_value;
%
MeasurementError_Tensor=zeros(n_TT);
for i_1=1:n_TT(1);
for i_2=1:n_TT(2);
for i_3=1:n_TT(3);
for i_4=1:n_TT(4);
for i_5=1:n_TT(5);
for i_6=1:n_TT(6);
for i_7=1:n_TT(7);  
for i_8=1:n_TT(8);   
for i_9=1:n_TT(9);  
for i_10=1:n_TT(10);  
MeasurementError_Tensor(i_1,i_2,i_3,i_4,i_5,i_6,i_7,i_8,i_9,i_10)=mu_set*randn(1,1)/sqrt((d_TT-2)*2*(Length_r_max_1-1)^2+2*2*(Length_r_max_1-1)-(Length_r_max_1-1)^2);
end
end
end
end
end
end
end
end
end
end
%


nswp=100; % Maximum Number of iterations
%eta=eta_set;
Length_r_max = Length_r_max_1;% Estimated rank =Length_r_max-1

%
B=A+eta(appeoximate_error)*LowRankError_Tensor;
C=B+MeasurementError_Tensor;
fun = @(ind) C(ind(1), ind(2), ind(3), ind(4), ind(5), ind(6), ind(7), ind(8), ind(9), ind(10) );
[y,Jyl,Jyr,ilocl,ilocr,evalcnt,Error_final]=greedy2_cross_Version_ZhenQin1(n_TT, fun, 1e-15, nswp, Length_r_max, []);

% Using Tau to truncate the diagonal matrix of SVD
tau=0;
tau1=Tau_design(appeoximate_error);
r_Length=zeros(length(ilocl)-2,1);
for iii=1:length(ilocl)-2
    r_Length(iii)=length(ilocl{iii+1});
end
Tensor=C;

[Y]=AddingTau(ilocl,ilocr,Tensor,n_TT,r_Length,tau);
[Y1]=AddingTau(ilocl,ilocr,Tensor,n_TT,r_Length,tau1);


MSE_CA_N=0;
MSE_CA_N1=0;
MSE_CA_D=0;
for i_1=1:n_TT(1);
for i_2=1:n_TT(2);
for i_3=1:n_TT(3);
for i_4=1:n_TT(4);
for i_5=1:n_TT(5);
for i_6=1:n_TT(6);
for i_7=1:n_TT(7);
for i_8=1:n_TT(8);
for i_9=1:n_TT(9);
for i_10=1:n_TT(10);
%
MSE_CA_D=MSE_CA_D+B(i_1,i_2,i_3,i_4,i_5,i_6,i_7,i_8,i_9,i_10)^2;
%
MSE_CA_N=MSE_CA_N+(B(i_1,i_2,i_3,i_4,i_5,i_6,i_7,i_8,i_9,i_10)-Y{1}(i_1,:)*reshape(Y{2}(:,i_2,:),[r_Length(1),r_Length(2)])*...
reshape(Y{3}(:,i_3,:),[r_Length(2),r_Length(3)])*reshape(Y{4}(:,i_4,:),[r_Length(3),r_Length(4)])*...
reshape(Y{5}(:,i_5,:),[r_Length(4),r_Length(5)])*reshape(Y{6}(:,i_6,:),[r_Length(5),r_Length(6)])*...
reshape(Y{7}(:,i_7,:),[r_Length(6),r_Length(7)])*reshape(Y{8}(:,i_8,:),[r_Length(7),r_Length(8)])*...
reshape(Y{9}(:,i_9,:),[r_Length(8),r_Length(9)])*Y{10}(:,i_10))^2;
%
MSE_CA_N1=MSE_CA_N1+(B(i_1,i_2,i_3,i_4,i_5,i_6,i_7,i_8,i_9,i_10)-Y1{1}(i_1,:)*reshape(Y1{2}(:,i_2,:),[r_Length(1),r_Length(2)])*...
reshape(Y1{3}(:,i_3,:),[r_Length(2),r_Length(3)])*reshape(Y1{4}(:,i_4,:),[r_Length(3),r_Length(4)])*...
reshape(Y1{5}(:,i_5,:),[r_Length(4),r_Length(5)])*reshape(Y1{6}(:,i_6,:),[r_Length(5),r_Length(6)])*...
reshape(Y1{7}(:,i_7,:),[r_Length(6),r_Length(7)])*reshape(Y1{8}(:,i_8,:),[r_Length(7),r_Length(8)])*...
reshape(Y1{9}(:,i_9,:),[r_Length(8),r_Length(9)])*Y1{10}(:,i_10))^2;
end
end
end
end
end
end
end
end
end
end

MSE(appeoximate_error,ii_11)=MSE_CA_N/MSE_CA_D;
MSE1(appeoximate_error,ii_11)=MSE_CA_N1/MSE_CA_D;


end
end

%% Given a full tensor %Full tensor %10-order

for ii_11=1:NumberofIterations
%
for appeoximate_error = 1:7
n_TT = [2, 2, 2, 2, 2, 2, 2, 2,2,2];%the unmber of n_TT equals to d_TT
d_TT=10;
r_TT=[1,2,2,2,2,2,2,2,2,2,1];
A_low_rank_TT_Tensor=tt_random(n_TT,d_TT,r_TT);
A_low_rank_TT_Tensor_vector=full(A_low_rank_TT_Tensor);
A=reshape(A_low_rank_TT_Tensor_vector,n_TT); %From TT-Tensor to original Tensor
B=reshape(A,[2,2^(d_TT-1)]);
B_value=norm(B,'fro');
A=A/B_value;
%
LowRankError_Tensor=randn(2, 2, 2, 2, 2, 2,2,2,2,2);
C=reshape(LowRankError_Tensor,[2,2^(d_TT-1)]);
C_value=norm(C,'fro');
LowRankError_Tensor=LowRankError_Tensor/C_value;
%
MeasurementError_Tensor=zeros(n_TT);
for i_1=1:n_TT(1);
for i_2=1:n_TT(2);
for i_3=1:n_TT(3);
for i_4=1:n_TT(4);
for i_5=1:n_TT(5);
for i_6=1:n_TT(6);
for i_7=1:n_TT(7);  
for i_8=1:n_TT(8);   
for i_9=1:n_TT(9);  
for i_10=1:n_TT(10);  
MeasurementError_Tensor(i_1,i_2,i_3,i_4,i_5,i_6,i_7,i_8,i_9,i_10)=mu_set*randn(1,1)/sqrt((d_TT-2)*2*(Length_r_max_2-1)^2+2*2*(Length_r_max_2-1)-(Length_r_max_2-1)^2);
end
end
end
end
end
end
end
end
end
end
%


nswp=100; % Maximum Number of iterations
%eta=eta_set;
Length_r_max = Length_r_max_2;% Estimated rank =Length_r_max-1

%
B=A+eta(appeoximate_error)*LowRankError_Tensor;
C=B+MeasurementError_Tensor;
fun = @(ind) C(ind(1), ind(2), ind(3), ind(4), ind(5), ind(6), ind(7), ind(8), ind(9), ind(10) );
[y,Jyl,Jyr,ilocl,ilocr,evalcnt,Error_final]=greedy2_cross_Version_ZhenQin1(n_TT, fun, 1e-15, nswp, Length_r_max, []);

% Using Tau to truncate the diagonal matrix of SVD
tau=0;
tau1=Tau_design(appeoximate_error);
r_Length=zeros(length(ilocl)-2,1);
for iii=1:length(ilocl)-2
    r_Length(iii)=length(ilocl{iii+1});
end
Tensor=C;

[Y]=AddingTau(ilocl,ilocr,Tensor,n_TT,r_Length,tau);
[Y1]=AddingTau(ilocl,ilocr,Tensor,n_TT,r_Length,tau1);


MSE_CA_N=0;
MSE_CA_N1=0;
MSE_CA_D=0;
for i_1=1:n_TT(1);
for i_2=1:n_TT(2);
for i_3=1:n_TT(3);
for i_4=1:n_TT(4);
for i_5=1:n_TT(5);
for i_6=1:n_TT(6);
for i_7=1:n_TT(7);
for i_8=1:n_TT(8);
for i_9=1:n_TT(9);
for i_10=1:n_TT(10);
%
MSE_CA_D=MSE_CA_D+B(i_1,i_2,i_3,i_4,i_5,i_6,i_7,i_8,i_9,i_10)^2;
%
MSE_CA_N=MSE_CA_N+(B(i_1,i_2,i_3,i_4,i_5,i_6,i_7,i_8,i_9,i_10)-Y{1}(i_1,:)*reshape(Y{2}(:,i_2,:),[r_Length(1),r_Length(2)])*...
reshape(Y{3}(:,i_3,:),[r_Length(2),r_Length(3)])*reshape(Y{4}(:,i_4,:),[r_Length(3),r_Length(4)])*...
reshape(Y{5}(:,i_5,:),[r_Length(4),r_Length(5)])*reshape(Y{6}(:,i_6,:),[r_Length(5),r_Length(6)])*...
reshape(Y{7}(:,i_7,:),[r_Length(6),r_Length(7)])*reshape(Y{8}(:,i_8,:),[r_Length(7),r_Length(8)])*...
reshape(Y{9}(:,i_9,:),[r_Length(8),r_Length(9)])*Y{10}(:,i_10))^2;
%
MSE_CA_N1=MSE_CA_N1+(B(i_1,i_2,i_3,i_4,i_5,i_6,i_7,i_8,i_9,i_10)-Y1{1}(i_1,:)*reshape(Y1{2}(:,i_2,:),[r_Length(1),r_Length(2)])*...
reshape(Y1{3}(:,i_3,:),[r_Length(2),r_Length(3)])*reshape(Y1{4}(:,i_4,:),[r_Length(3),r_Length(4)])*...
reshape(Y1{5}(:,i_5,:),[r_Length(4),r_Length(5)])*reshape(Y1{6}(:,i_6,:),[r_Length(5),r_Length(6)])*...
reshape(Y1{7}(:,i_7,:),[r_Length(6),r_Length(7)])*reshape(Y1{8}(:,i_8,:),[r_Length(7),r_Length(8)])*...
reshape(Y1{9}(:,i_9,:),[r_Length(8),r_Length(9)])*Y1{10}(:,i_10))^2;
end
end
end
end
end
end
end
end
end
end

MSE2(appeoximate_error,ii_11)=MSE_CA_N/MSE_CA_D;
MSE3(appeoximate_error,ii_11)=MSE_CA_N1/MSE_CA_D;


end
end

%% Given a full tensor %Full tensor %10-order

for ii_11=1:NumberofIterations
%
for appeoximate_error = 1:7
n_TT = [2, 2, 2, 2, 2, 2, 2, 2,2,2];%the unmber of n_TT equals to d_TT
d_TT=10;
r_TT=[1,2,2,2,2,2,2,2,2,2,1];
A_low_rank_TT_Tensor=tt_random(n_TT,d_TT,r_TT);
A_low_rank_TT_Tensor_vector=full(A_low_rank_TT_Tensor);
A=reshape(A_low_rank_TT_Tensor_vector,n_TT); %From TT-Tensor to original Tensor
B=reshape(A,[2,2^(d_TT-1)]);
B_value=norm(B,'fro');
A=A/B_value;
%
LowRankError_Tensor=randn(2, 2, 2, 2, 2, 2,2,2,2,2);
C=reshape(LowRankError_Tensor,[2,2^(d_TT-1)]);
C_value=norm(C,'fro');
LowRankError_Tensor=LowRankError_Tensor/C_value;
%
MeasurementError_Tensor=zeros(n_TT);
for i_1=1:n_TT(1);
for i_2=1:n_TT(2);
for i_3=1:n_TT(3);
for i_4=1:n_TT(4);
for i_5=1:n_TT(5);
for i_6=1:n_TT(6);
for i_7=1:n_TT(7);  
for i_8=1:n_TT(8);   
for i_9=1:n_TT(9);  
for i_10=1:n_TT(10);  
MeasurementError_Tensor(i_1,i_2,i_3,i_4,i_5,i_6,i_7,i_8,i_9,i_10)=mu_set*randn(1,1)/sqrt((d_TT-2)*2*(Length_r_max_3-1)^2+2*2*(Length_r_max_3-1)-(Length_r_max_3-1)^2);
end
end
end
end
end
end
end
end
end
end
%


nswp=100; % Maximum Number of iterations
%eta=eta_set;
Length_r_max = Length_r_max_3;% Estimated rank =Length_r_max-1

%
B=A+eta(appeoximate_error)*LowRankError_Tensor;
C=B+MeasurementError_Tensor;
fun = @(ind) C(ind(1), ind(2), ind(3), ind(4), ind(5), ind(6), ind(7), ind(8), ind(9), ind(10) );
[y,Jyl,Jyr,ilocl,ilocr,evalcnt,Error_final]=greedy2_cross_Version_ZhenQin1(n_TT, fun, 1e-15, nswp, Length_r_max, []);

% Using Tau to truncate the diagonal matrix of SVD
tau=0;
tau1=Tau_design(appeoximate_error);
r_Length=zeros(length(ilocl)-2,1);
for iii=1:length(ilocl)-2
    r_Length(iii)=length(ilocl{iii+1});
end
Tensor=C;

[Y]=AddingTau(ilocl,ilocr,Tensor,n_TT,r_Length,tau);
[Y1]=AddingTau(ilocl,ilocr,Tensor,n_TT,r_Length,tau1);


MSE_CA_N=0;
MSE_CA_N1=0;
MSE_CA_D=0;
for i_1=1:n_TT(1);
for i_2=1:n_TT(2);
for i_3=1:n_TT(3);
for i_4=1:n_TT(4);
for i_5=1:n_TT(5);
for i_6=1:n_TT(6);
for i_7=1:n_TT(7);
for i_8=1:n_TT(8);
for i_9=1:n_TT(9);
for i_10=1:n_TT(10);
%
MSE_CA_D=MSE_CA_D+B(i_1,i_2,i_3,i_4,i_5,i_6,i_7,i_8,i_9,i_10)^2;
%
MSE_CA_N=MSE_CA_N+(B(i_1,i_2,i_3,i_4,i_5,i_6,i_7,i_8,i_9,i_10)-Y{1}(i_1,:)*reshape(Y{2}(:,i_2,:),[r_Length(1),r_Length(2)])*...
reshape(Y{3}(:,i_3,:),[r_Length(2),r_Length(3)])*reshape(Y{4}(:,i_4,:),[r_Length(3),r_Length(4)])*...
reshape(Y{5}(:,i_5,:),[r_Length(4),r_Length(5)])*reshape(Y{6}(:,i_6,:),[r_Length(5),r_Length(6)])*...
reshape(Y{7}(:,i_7,:),[r_Length(6),r_Length(7)])*reshape(Y{8}(:,i_8,:),[r_Length(7),r_Length(8)])*...
reshape(Y{9}(:,i_9,:),[r_Length(8),r_Length(9)])*Y{10}(:,i_10))^2;
%
MSE_CA_N1=MSE_CA_N1+(B(i_1,i_2,i_3,i_4,i_5,i_6,i_7,i_8,i_9,i_10)-Y1{1}(i_1,:)*reshape(Y1{2}(:,i_2,:),[r_Length(1),r_Length(2)])*...
reshape(Y1{3}(:,i_3,:),[r_Length(2),r_Length(3)])*reshape(Y1{4}(:,i_4,:),[r_Length(3),r_Length(4)])*...
reshape(Y1{5}(:,i_5,:),[r_Length(4),r_Length(5)])*reshape(Y1{6}(:,i_6,:),[r_Length(5),r_Length(6)])*...
reshape(Y1{7}(:,i_7,:),[r_Length(6),r_Length(7)])*reshape(Y1{8}(:,i_8,:),[r_Length(7),r_Length(8)])*...
reshape(Y1{9}(:,i_9,:),[r_Length(8),r_Length(9)])*Y1{10}(:,i_10))^2;
end
end
end
end
end
end
end
end
end
end

MSE4(appeoximate_error,ii_11)=MSE_CA_N/MSE_CA_D;
MSE5(appeoximate_error,ii_11)=MSE_CA_N1/MSE_CA_D;


end
end

%%


MSE_average_CUR_advance=sum(MSE,2)./NumberofIterations;
MSE_tau_average_CUR_advance=sum(MSE1,2)./NumberofIterations;
MSE_average_CUR_advance1=sum(MSE2,2)./NumberofIterations;
MSE_tau_average_CUR_advance1=sum(MSE3,2)./NumberofIterations;
MSE_average_CUR_advance2=sum(MSE4,2)./NumberofIterations;
MSE_tau_average_CUR_advance2=sum(MSE5,2)./NumberofIterations;


MSE_average_CUR=10*log10(MSE_average_CUR_advance);
MSE_tau_average_CUR=10*log10(MSE_tau_average_CUR_advance);
MSE_average_CUR1=10*log10(MSE_average_CUR_advance1);
MSE_tau_average_CUR1=10*log10(MSE_tau_average_CUR_advance1);
MSE_average_CUR2=10*log10(MSE_average_CUR_advance2);
MSE_tau_average_CUR2=10*log10(MSE_tau_average_CUR_advance2);


figure(1)
X=1:1:7;
A_1=plot(X,MSE_average_CUR,'-kh',X,MSE_tau_average_CUR,'-b*',X,MSE_average_CUR1,'-.kh',X,MSE_tau_average_CUR1,'-.b*',X,MSE_average_CUR2,':kh',X,MSE_tau_average_CUR2,':b*');
set(A_1,'LineWidth',2);
legend('\tau=0, r=3','\tau=10^{-7}, r=3','\tau=0, r=4','\tau=10^{-7}, r=4','\tau=0, r=5','\tau=10^{-7}, r=5')
xlabel('$\eta$ ','FontSize',12,'FontName', 'Times New Roman','Interpreter','LaTex')
%xlabel('$l_{\rm max}$','FontSize',12,'FontName', 'Times New Roman','Interpreter','LaTex');
ylabel('MSE (dB)')
grid on;

figure(2)
X=1:1:7;
A_1=plot(X,MSE_tau_average_CUR,'-k*',X,MSE_tau_average_CUR1,'-bs',X,MSE_tau_average_CUR2,'-r^');
set(A_1,'LineWidth',2);
legend('r=3','r=4','r=5')
xlabel('$\eta$ ','FontSize',12,'FontName', 'Times New Roman','Interpreter','LaTex')
%xlabel('$l_{\rm max}$','FontSize',12,'FontName', 'Times New Roman','Interpreter','LaTex');
ylabel('MSE (dB)')
grid on;
