# Supplementary material
Source: ML conference proceedings conference paper supplement (https://proceedings.neurips.cc/paper_files/paper/2022/hash/5bd9fbb3a5a985f80c16ddd0ec1dfc43-Abstract.html)
Supplement: Supplementary file 1 [file 5bd9fbb3a5a985f80c16ddd0ec1dfc43-Supplemental-Conference.zip › Tensor_differentOrder_tau_Nips22_Nex.m]

%A_low_rank_TT_Tensor=tt_random(2*ones(1,40),40,[1,2*ones(1,39),1]);
clc;
clear all;
close all;
NumberofIterations = 100;
Length_r_max_design=3;
mu_1 = 1e-5;
mu_2 = 1e-4;
mu_3 = 1e-3;


%% Mu_1
%% Given a full tensor %Full tensor %5-order

for ii_11=1:NumberofIterations
     
%
n_TT = 2*ones(1,5);
d_TT = 5;
r_TT = [1,2*ones(1,5-1),1];
A=tt_random(n_TT,d_TT,r_TT);


nswp=100; % Maximum Number of iterations
Length_r_max=Length_r_max_design;% Estimated rank =Length_r_max-1
%

fun = @(ind) A(ind(1), ind(2), ind(3), ind(4), ind(5) ) + mu_1*randn(1,1)/sqrt((d_TT-2)*8+2*4-4) ;
[y,Jyl,Jyr,ilocl,ilocr,evalcnt,Error_final]=greedy2_cross_Version_ZhenQin1(n_TT, fun, 1e-15, nswp, Length_r_max, []);


MSE(1,ii_11)=Error_final;
end

%% Given a full tensor %Full tensor %10-order

for ii_11=1:NumberofIterations
     
%
n_TT = 2*ones(1,10);
d_TT = 10;
r_TT = [1,2*ones(1,10-1),1];
A=tt_random(n_TT,d_TT,r_TT);


nswp=100; % Maximum Number of iterations
Length_r_max=Length_r_max_design;% Estimated rank =Length_r_max-1
%

fun = @(ind) A(ind(1), ind(2), ind(3), ind(4), ind(5),ind(6), ind(7), ind(8), ind(9), ind(10) ) + mu_1*randn(1,1)/sqrt((d_TT-2)*8+2*4-4) ;
[y,Jyl,Jyr,ilocl,ilocr,evalcnt,Error_final]=greedy2_cross_Version_ZhenQin1(n_TT, fun, 1e-15, nswp, Length_r_max, []);


MSE(2,ii_11)=Error_final;
end

%% Given a full tensor %Full tensor %15-order

for ii_11=1:NumberofIterations
     
%
n_TT = 2*ones(1,15);
d_TT = 15;
r_TT = [1,2*ones(1,15-1),1];
A=tt_random(n_TT,d_TT,r_TT);


nswp=100; % Maximum Number of iterations
Length_r_max=Length_r_max_design;% Estimated rank =Length_r_max-1
%

fun = @(ind) A(ind(1), ind(2), ind(3), ind(4), ind(5),ind(6), ind(7), ind(8), ind(9), ind(10)...
    ,ind(11), ind(12), ind(13), ind(14), ind(15)) + mu_1*randn(1,1)/sqrt((d_TT-2)*8+2*4-4) ;
[y,Jyl,Jyr,ilocl,ilocr,evalcnt,Error_final]=greedy2_cross_Version_ZhenQin1(n_TT, fun, 1e-15, nswp, Length_r_max, []);


MSE(3,ii_11)=Error_final;
end

%% Given a full tensor %Full tensor %20-order

for ii_11=1:NumberofIterations
     
%
n_TT = 2*ones(1,20);
d_TT = 20;
r_TT = [1,2*ones(1,20-1),1];
A=tt_random(n_TT,d_TT,r_TT);


nswp=100; % Maximum Number of iterations
Length_r_max=Length_r_max_design;% Estimated rank =Length_r_max-1
%

fun = @(ind) A(ind(1), ind(2), ind(3), ind(4), ind(5),ind(6), ind(7), ind(8), ind(9), ind(10)...
    ,ind(11), ind(12), ind(13), ind(14), ind(15),ind(16), ind(17), ind(18), ind(19), ind(20)) + mu_1*randn(1,1)/sqrt((d_TT-2)*8+2*4-4) ;
[y,Jyl,Jyr,ilocl,ilocr,evalcnt,Error_final]=greedy2_cross_Version_ZhenQin1(n_TT, fun, 1e-15, nswp, Length_r_max, []);


MSE(4,ii_11)=Error_final;
end

%% Given a full tensor %Full tensor %25-order

for ii_11=1:NumberofIterations
     
%
n_TT = 2*ones(1,25);
d_TT = 25;
r_TT = [1,2*ones(1,25-1),1];
A=tt_random(n_TT,d_TT,r_TT);


nswp=100; % Maximum Number of iterations
Length_r_max=Length_r_max_design;% Estimated rank =Length_r_max-1
%

fun = @(ind) A(ind(1), ind(2), ind(3), ind(4), ind(5),ind(6), ind(7), ind(8), ind(9), ind(10)...
    ,ind(11), ind(12), ind(13), ind(14), ind(15),ind(16), ind(17), ind(18), ind(19), ind(20)...
    ,ind(21), ind(22), ind(23), ind(24), ind(25)) + mu_1*randn(1,1)/sqrt((d_TT-2)*8+2*4-4) ;
[y,Jyl,Jyr,ilocl,ilocr,evalcnt,Error_final]=greedy2_cross_Version_ZhenQin1(n_TT, fun, 1e-15, nswp, Length_r_max, []);


MSE(5,ii_11)=Error_final;
end


%% Given a full tensor %Full tensor %30-order

for ii_11=1:NumberofIterations
     
%
n_TT = 2*ones(1,30);
d_TT = 30;
r_TT = [1,2*ones(1,30-1),1];
A=tt_random(n_TT,d_TT,r_TT);


nswp=100; % Maximum Number of iterations
Length_r_max=Length_r_max_design;% Estimated rank =Length_r_max-1
%

fun = @(ind) A(ind(1), ind(2), ind(3), ind(4), ind(5),ind(6), ind(7), ind(8), ind(9), ind(10)...
    ,ind(11), ind(12), ind(13), ind(14), ind(15),ind(16), ind(17), ind(18), ind(19), ind(20)...
    ,ind(21), ind(22), ind(23), ind(24), ind(25),ind(26), ind(27), ind(28), ind(29), ind(30)) + mu_1*randn(1,1)/sqrt((d_TT-2)*8+2*4-4) ;
[y,Jyl,Jyr,ilocl,ilocr,evalcnt,Error_final]=greedy2_cross_Version_ZhenQin1(n_TT, fun, 1e-15, nswp, Length_r_max, []);


MSE(6,ii_11)=Error_final;
end

%% Given a full tensor %Full tensor %35-order

for ii_11=1:NumberofIterations
     
%
n_TT = 2*ones(1,35);
d_TT = 35;
r_TT = [1,2*ones(1,35-1),1];
A=tt_random(n_TT,d_TT,r_TT);


nswp=100; % Maximum Number of iterations
Length_r_max=Length_r_max_design;% Estimated rank =Length_r_max-1
%

fun = @(ind) A(ind(1), ind(2), ind(3), ind(4), ind(5),ind(6), ind(7), ind(8), ind(9), ind(10)...
    ,ind(11), ind(12), ind(13), ind(14), ind(15),ind(16), ind(17), ind(18), ind(19), ind(20)...
    ,ind(21), ind(22), ind(23), ind(24), ind(25),ind(26), ind(27), ind(28), ind(29), ind(30)...
    ,ind(31), ind(32), ind(33), ind(34), ind(35)) + mu_1*randn(1,1)/sqrt((d_TT-2)*8+2*4-4) ;
[y,Jyl,Jyr,ilocl,ilocr,evalcnt,Error_final]=greedy2_cross_Version_ZhenQin1(n_TT, fun, 1e-15, nswp, Length_r_max, []);


MSE(7,ii_11)=Error_final;
end

%% Given a full tensor %Full tensor %40-order

for ii_11=1:NumberofIterations
     
%
n_TT = 2*ones(1,40);
d_TT = 40;
r_TT = [1,2*ones(1,40-1),1];
A=tt_random(n_TT,d_TT,r_TT);


nswp=100; % Maximum Number of iterations
Length_r_max=Length_r_max_design;% Estimated rank =Length_r_max-1
%

fun = @(ind) A(ind(1), ind(2), ind(3), ind(4), ind(5),ind(6), ind(7), ind(8), ind(9), ind(10)...
    ,ind(11), ind(12), ind(13), ind(14), ind(15),ind(16), ind(17), ind(18), ind(19), ind(20)...
    ,ind(21), ind(22), ind(23), ind(24), ind(25),ind(26), ind(27), ind(28), ind(29), ind(30)...
    ,ind(31), ind(32), ind(33), ind(34), ind(35),ind(36), ind(37), ind(38), ind(39), ind(40)) + mu_1*randn(1,1)/sqrt((d_TT-2)*8+2*4-4) ;
[y,Jyl,Jyr,ilocl,ilocr,evalcnt,Error_final]=greedy2_cross_Version_ZhenQin1(n_TT, fun, 1e-15, nswp, Length_r_max, []);


MSE(8,ii_11)=Error_final;
end

%% Given a full tensor %Full tensor %45-order

for ii_11=1:NumberofIterations
     
%
n_TT = 2*ones(1,45);
d_TT = 45;
r_TT = [1,2*ones(1,45-1),1];
A=tt_random(n_TT,d_TT,r_TT);


nswp=100; % Maximum Number of iterations
Length_r_max=Length_r_max_design;% Estimated rank =Length_r_max-1
%

fun = @(ind) A(ind(1), ind(2), ind(3), ind(4), ind(5),ind(6), ind(7), ind(8), ind(9), ind(10)...
    ,ind(11), ind(12), ind(13), ind(14), ind(15),ind(16), ind(17), ind(18), ind(19), ind(20)...
    ,ind(21), ind(22), ind(23), ind(24), ind(25),ind(26), ind(27), ind(28), ind(29), ind(30)...
    ,ind(31), ind(32), ind(33), ind(34), ind(35),ind(36), ind(37), ind(38), ind(39), ind(40)...
    ,ind(41), ind(42), ind(43), ind(44), ind(45)) + mu_1*randn(1,1)/sqrt((d_TT-2)*8+2*4-4) ;
[y,Jyl,Jyr,ilocl,ilocr,evalcnt,Error_final]=greedy2_cross_Version_ZhenQin1(n_TT, fun, 1e-15, nswp, Length_r_max, []);


MSE(9,ii_11)=Error_final;
end


%% Given a full tensor %Full tensor %50-order

for ii_11=1:NumberofIterations
     
%
n_TT = 2*ones(1,50);
d_TT = 50;
r_TT = [1,2*ones(1,50-1),1];
A=tt_random(n_TT,d_TT,r_TT);


nswp=100; % Maximum Number of iterations
Length_r_max=Length_r_max_design;% Estimated rank =Length_r_max-1
%

fun = @(ind) A(ind(1), ind(2), ind(3), ind(4), ind(5),ind(6), ind(7), ind(8), ind(9), ind(10)...
    ,ind(11), ind(12), ind(13), ind(14), ind(15),ind(16), ind(17), ind(18), ind(19), ind(20)...
    ,ind(21), ind(22), ind(23), ind(24), ind(25),ind(26), ind(27), ind(28), ind(29), ind(30)...
    ,ind(31), ind(32), ind(33), ind(34), ind(35),ind(36), ind(37), ind(38), ind(39), ind(40)...
    ,ind(41), ind(42), ind(43), ind(44), ind(45),ind(46), ind(47), ind(48), ind(49), ind(50)) + mu_1*randn(1,1)/sqrt((d_TT-2)*8+2*4-4) ;
[y,Jyl,Jyr,ilocl,ilocr,evalcnt,Error_final]=greedy2_cross_Version_ZhenQin1(n_TT, fun, 1e-15, nswp, Length_r_max, []);


MSE(10,ii_11)=Error_final;
end


%% Mu_2
%% Given a full tensor %Full tensor %5-order

for ii_11=1:NumberofIterations
     
%
n_TT = 2*ones(1,5);
d_TT = 5;
r_TT = [1,2*ones(1,5-1),1];
A=tt_random(n_TT,d_TT,r_TT);


nswp=100; % Maximum Number of iterations
Length_r_max=Length_r_max_design;% Estimated rank =Length_r_max-1
%

fun = @(ind) A(ind(1), ind(2), ind(3), ind(4), ind(5) ) + mu_2*randn(1,1)/sqrt((d_TT-2)*8+2*4-4) ;
[y,Jyl,Jyr,ilocl,ilocr,evalcnt,Error_final]=greedy2_cross_Version_ZhenQin1(n_TT, fun, 1e-15, nswp, Length_r_max, []);


MSE1(1,ii_11)=Error_final;
end

%% Given a full tensor %Full tensor %10-order

for ii_11=1:NumberofIterations
     
%
n_TT = 2*ones(1,10);
d_TT = 10;
r_TT = [1,2*ones(1,10-1),1];
A=tt_random(n_TT,d_TT,r_TT);


nswp=100; % Maximum Number of iterations
Length_r_max=Length_r_max_design;% Estimated rank =Length_r_max-1
%

fun = @(ind) A(ind(1), ind(2), ind(3), ind(4), ind(5),ind(6), ind(7), ind(8), ind(9), ind(10) ) + mu_2*randn(1,1)/sqrt((d_TT-2)*8+2*4-4) ;
[y,Jyl,Jyr,ilocl,ilocr,evalcnt,Error_final]=greedy2_cross_Version_ZhenQin1(n_TT, fun, 1e-15, nswp, Length_r_max, []);


MSE1(2,ii_11)=Error_final;
end

%% Given a full tensor %Full tensor %15-order

for ii_11=1:NumberofIterations
     
%
n_TT = 2*ones(1,15);
d_TT = 15;
r_TT = [1,2*ones(1,15-1),1];
A=tt_random(n_TT,d_TT,r_TT);


nswp=100; % Maximum Number of iterations
Length_r_max=Length_r_max_design;% Estimated rank =Length_r_max-1
%

fun = @(ind) A(ind(1), ind(2), ind(3), ind(4), ind(5),ind(6), ind(7), ind(8), ind(9), ind(10)...
    ,ind(11), ind(12), ind(13), ind(14), ind(15)) + mu_2*randn(1,1)/sqrt((d_TT-2)*8+2*4-4) ;
[y,Jyl,Jyr,ilocl,ilocr,evalcnt,Error_final]=greedy2_cross_Version_ZhenQin1(n_TT, fun, 1e-15, nswp, Length_r_max, []);


MSE1(3,ii_11)=Error_final;
end

%% Given a full tensor %Full tensor %20-order

for ii_11=1:NumberofIterations
     
%
n_TT = 2*ones(1,20);
d_TT = 20;
r_TT = [1,2*ones(1,20-1),1];
A=tt_random(n_TT,d_TT,r_TT);


nswp=100; % Maximum Number of iterations
Length_r_max=Length_r_max_design;% Estimated rank =Length_r_max-1
%

fun = @(ind) A(ind(1), ind(2), ind(3), ind(4), ind(5),ind(6), ind(7), ind(8), ind(9), ind(10)...
    ,ind(11), ind(12), ind(13), ind(14), ind(15),ind(16), ind(17), ind(18), ind(19), ind(20)) + mu_2*randn(1,1)/sqrt((d_TT-2)*8+2*4-4) ;
[y,Jyl,Jyr,ilocl,ilocr,evalcnt,Error_final]=greedy2_cross_Version_ZhenQin1(n_TT, fun, 1e-15, nswp, Length_r_max, []);


MSE1(4,ii_11)=Error_final;
end

%% Given a full tensor %Full tensor %25-order

for ii_11=1:NumberofIterations
     
%
n_TT = 2*ones(1,25);
d_TT = 25;
r_TT = [1,2*ones(1,25-1),1];
A=tt_random(n_TT,d_TT,r_TT);


nswp=100; % Maximum Number of iterations
Length_r_max=Length_r_max_design;% Estimated rank =Length_r_max-1
%

fun = @(ind) A(ind(1), ind(2), ind(3), ind(4), ind(5),ind(6), ind(7), ind(8), ind(9), ind(10)...
    ,ind(11), ind(12), ind(13), ind(14), ind(15),ind(16), ind(17), ind(18), ind(19), ind(20)...
    ,ind(21), ind(22), ind(23), ind(24), ind(25)) + mu_2*randn(1,1)/sqrt((d_TT-2)*8+2*4-4) ;
[y,Jyl,Jyr,ilocl,ilocr,evalcnt,Error_final]=greedy2_cross_Version_ZhenQin1(n_TT, fun, 1e-15, nswp, Length_r_max, []);


MSE1(5,ii_11)=Error_final;
end


%% Given a full tensor %Full tensor %30-order

for ii_11=1:NumberofIterations
     
%
n_TT = 2*ones(1,30);
d_TT = 30;
r_TT = [1,2*ones(1,30-1),1];
A=tt_random(n_TT,d_TT,r_TT);


nswp=100; % Maximum Number of iterations
Length_r_max=Length_r_max_design;% Estimated rank =Length_r_max-1
%

fun = @(ind) A(ind(1), ind(2), ind(3), ind(4), ind(5),ind(6), ind(7), ind(8), ind(9), ind(10)...
    ,ind(11), ind(12), ind(13), ind(14), ind(15),ind(16), ind(17), ind(18), ind(19), ind(20)...
    ,ind(21), ind(22), ind(23), ind(24), ind(25),ind(26), ind(27), ind(28), ind(29), ind(30)) + mu_2*randn(1,1)/sqrt((d_TT-2)*8+2*4-4) ;
[y,Jyl,Jyr,ilocl,ilocr,evalcnt,Error_final]=greedy2_cross_Version_ZhenQin1(n_TT, fun, 1e-15, nswp, Length_r_max, []);


MSE1(6,ii_11)=Error_final;
end

%% Given a full tensor %Full tensor %35-order

for ii_11=1:NumberofIterations
     
%
n_TT = 2*ones(1,35);
d_TT = 35;
r_TT = [1,2*ones(1,35-1),1];
A=tt_random(n_TT,d_TT,r_TT);


nswp=100; % Maximum Number of iterations
Length_r_max=Length_r_max_design;% Estimated rank =Length_r_max-1
%

fun = @(ind) A(ind(1), ind(2), ind(3), ind(4), ind(5),ind(6), ind(7), ind(8), ind(9), ind(10)...
    ,ind(11), ind(12), ind(13), ind(14), ind(15),ind(16), ind(17), ind(18), ind(19), ind(20)...
    ,ind(21), ind(22), ind(23), ind(24), ind(25),ind(26), ind(27), ind(28), ind(29), ind(30)...
    ,ind(31), ind(32), ind(33), ind(34), ind(35)) + mu_2*randn(1,1)/sqrt((d_TT-2)*8+2*4-4) ;
[y,Jyl,Jyr,ilocl,ilocr,evalcnt,Error_final]=greedy2_cross_Version_ZhenQin1(n_TT, fun, 1e-15, nswp, Length_r_max, []);


MSE1(7,ii_11)=Error_final;
end

%% Given a full tensor %Full tensor %40-order

for ii_11=1:NumberofIterations
     
%
n_TT = 2*ones(1,40);
d_TT = 40;
r_TT = [1,2*ones(1,40-1),1];
A=tt_random(n_TT,d_TT,r_TT);


nswp=100; % Maximum Number of iterations
Length_r_max=Length_r_max_design;% Estimated rank =Length_r_max-1
%

fun = @(ind) A(ind(1), ind(2), ind(3), ind(4), ind(5),ind(6), ind(7), ind(8), ind(9), ind(10)...
    ,ind(11), ind(12), ind(13), ind(14), ind(15),ind(16), ind(17), ind(18), ind(19), ind(20)...
    ,ind(21), ind(22), ind(23), ind(24), ind(25),ind(26), ind(27), ind(28), ind(29), ind(30)...
    ,ind(31), ind(32), ind(33), ind(34), ind(35),ind(36), ind(37), ind(38), ind(39), ind(40)) + mu_2*randn(1,1)/sqrt((d_TT-2)*8+2*4-4) ;
[y,Jyl,Jyr,ilocl,ilocr,evalcnt,Error_final]=greedy2_cross_Version_ZhenQin1(n_TT, fun, 1e-15, nswp, Length_r_max, []);


MSE1(8,ii_11)=Error_final;
end

%% Given a full tensor %Full tensor %45-order

for ii_11=1:NumberofIterations
     
%
n_TT = 2*ones(1,45);
d_TT = 45;
r_TT = [1,2*ones(1,45-1),1];
A=tt_random(n_TT,d_TT,r_TT);


nswp=100; % Maximum Number of iterations
Length_r_max=Length_r_max_design;% Estimated rank =Length_r_max-1
%

fun = @(ind) A(ind(1), ind(2), ind(3), ind(4), ind(5),ind(6), ind(7), ind(8), ind(9), ind(10)...
    ,ind(11), ind(12), ind(13), ind(14), ind(15),ind(16), ind(17), ind(18), ind(19), ind(20)...
    ,ind(21), ind(22), ind(23), ind(24), ind(25),ind(26), ind(27), ind(28), ind(29), ind(30)...
    ,ind(31), ind(32), ind(33), ind(34), ind(35),ind(36), ind(37), ind(38), ind(39), ind(40)...
    ,ind(41), ind(42), ind(43), ind(44), ind(45)) + mu_2*randn(1,1)/sqrt((d_TT-2)*8+2*4-4) ;
[y,Jyl,Jyr,ilocl,ilocr,evalcnt,Error_final]=greedy2_cross_Version_ZhenQin1(n_TT, fun, 1e-15, nswp, Length_r_max, []);


MSE1(9,ii_11)=Error_final;
end


%% Given a full tensor %Full tensor %50-order

for ii_11=1:NumberofIterations
     
%
n_TT = 2*ones(1,50);
d_TT = 50;
r_TT = [1,2*ones(1,50-1),1];
A=tt_random(n_TT,d_TT,r_TT);


nswp=100; % Maximum Number of iterations
Length_r_max=Length_r_max_design;% Estimated rank =Length_r_max-1
%

fun = @(ind) A(ind(1), ind(2), ind(3), ind(4), ind(5),ind(6), ind(7), ind(8), ind(9), ind(10)...
    ,ind(11), ind(12), ind(13), ind(14), ind(15),ind(16), ind(17), ind(18), ind(19), ind(20)...
    ,ind(21), ind(22), ind(23), ind(24), ind(25),ind(26), ind(27), ind(28), ind(29), ind(30)...
    ,ind(31), ind(32), ind(33), ind(34), ind(35),ind(36), ind(37), ind(38), ind(39), ind(40)...
    ,ind(41), ind(42), ind(43), ind(44), ind(45),ind(46), ind(47), ind(48), ind(49), ind(50)) + mu_2*randn(1,1)/sqrt((d_TT-2)*8+2*4-4) ;
[y,Jyl,Jyr,ilocl,ilocr,evalcnt,Error_final]=greedy2_cross_Version_ZhenQin1(n_TT, fun, 1e-15, nswp, Length_r_max, []);


MSE1(10,ii_11)=Error_final;
end


%% Mu_3
%% Given a full tensor %Full tensor %5-order

for ii_11=1:NumberofIterations
     
%
n_TT = 2*ones(1,5);
d_TT = 5;
r_TT = [1,2*ones(1,5-1),1];
A=tt_random(n_TT,d_TT,r_TT);


nswp=100; % Maximum Number of iterations
Length_r_max=Length_r_max_design;% Estimated rank =Length_r_max-1
%

fun = @(ind) A(ind(1), ind(2), ind(3), ind(4), ind(5) ) + mu_3*randn(1,1)/sqrt((d_TT-2)*8+2*4-4) ;
[y,Jyl,Jyr,ilocl,ilocr,evalcnt,Error_final]=greedy2_cross_Version_ZhenQin1(n_TT, fun, 1e-15, nswp, Length_r_max, []);


MSE2(1,ii_11)=Error_final;
end

%% Given a full tensor %Full tensor %10-order

for ii_11=1:NumberofIterations
     
%
n_TT = 2*ones(1,10);
d_TT = 10;
r_TT = [1,2*ones(1,10-1),1];
A=tt_random(n_TT,d_TT,r_TT);


nswp=100; % Maximum Number of iterations
Length_r_max=Length_r_max_design;% Estimated rank =Length_r_max-1
%

fun = @(ind) A(ind(1), ind(2), ind(3), ind(4), ind(5),ind(6), ind(7), ind(8), ind(9), ind(10) ) + mu_3*randn(1,1)/sqrt((d_TT-2)*8+2*4-4) ;
[y,Jyl,Jyr,ilocl,ilocr,evalcnt,Error_final]=greedy2_cross_Version_ZhenQin1(n_TT, fun, 1e-15, nswp, Length_r_max, []);


MSE2(2,ii_11)=Error_final;
end

%% Given a full tensor %Full tensor %15-order

for ii_11=1:NumberofIterations
     
%
n_TT = 2*ones(1,15);
d_TT = 15;
r_TT = [1,2*ones(1,15-1),1];
A=tt_random(n_TT,d_TT,r_TT);


nswp=100; % Maximum Number of iterations
Length_r_max=Length_r_max_design;% Estimated rank =Length_r_max-1
%

fun = @(ind) A(ind(1), ind(2), ind(3), ind(4), ind(5),ind(6), ind(7), ind(8), ind(9), ind(10)...
    ,ind(11), ind(12), ind(13), ind(14), ind(15)) + mu_3*randn(1,1)/sqrt((d_TT-2)*8+2*4-4) ;
[y,Jyl,Jyr,ilocl,ilocr,evalcnt,Error_final]=greedy2_cross_Version_ZhenQin1(n_TT, fun, 1e-15, nswp, Length_r_max, []);


MSE2(3,ii_11)=Error_final;
end

%% Given a full tensor %Full tensor %20-order

for ii_11=1:NumberofIterations
     
%
n_TT = 2*ones(1,20);
d_TT = 20;
r_TT = [1,2*ones(1,20-1),1];
A=tt_random(n_TT,d_TT,r_TT);


nswp=100; % Maximum Number of iterations
Length_r_max=Length_r_max_design;% Estimated rank =Length_r_max-1
%

fun = @(ind) A(ind(1), ind(2), ind(3), ind(4), ind(5),ind(6), ind(7), ind(8), ind(9), ind(10)...
    ,ind(11), ind(12), ind(13), ind(14), ind(15),ind(16), ind(17), ind(18), ind(19), ind(20)) + mu_3*randn(1,1)/sqrt((d_TT-2)*8+2*4-4) ;
[y,Jyl,Jyr,ilocl,ilocr,evalcnt,Error_final]=greedy2_cross_Version_ZhenQin1(n_TT, fun, 1e-15, nswp, Length_r_max, []);


MSE2(4,ii_11)=Error_final;
end

%% Given a full tensor %Full tensor %25-order

for ii_11=1:NumberofIterations
     
%
n_TT = 2*ones(1,25);
d_TT = 25;
r_TT = [1,2*ones(1,25-1),1];
A=tt_random(n_TT,d_TT,r_TT);


nswp=100; % Maximum Number of iterations
Length_r_max=Length_r_max_design;% Estimated rank =Length_r_max-1
%

fun = @(ind) A(ind(1), ind(2), ind(3), ind(4), ind(5),ind(6), ind(7), ind(8), ind(9), ind(10)...
    ,ind(11), ind(12), ind(13), ind(14), ind(15),ind(16), ind(17), ind(18), ind(19), ind(20)...
    ,ind(21), ind(22), ind(23), ind(24), ind(25)) + mu_3*randn(1,1)/sqrt((d_TT-2)*8+2*4-4) ;
[y,Jyl,Jyr,ilocl,ilocr,evalcnt,Error_final]=greedy2_cross_Version_ZhenQin1(n_TT, fun, 1e-15, nswp, Length_r_max, []);


MSE2(5,ii_11)=Error_final;
end


%% Given a full tensor %Full tensor %30-order

for ii_11=1:NumberofIterations
     
%
n_TT = 2*ones(1,30);
d_TT = 30;
r_TT = [1,2*ones(1,30-1),1];
A=tt_random(n_TT,d_TT,r_TT);


nswp=100; % Maximum Number of iterations
Length_r_max=Length_r_max_design;% Estimated rank =Length_r_max-1
%

fun = @(ind) A(ind(1), ind(2), ind(3), ind(4), ind(5),ind(6), ind(7), ind(8), ind(9), ind(10)...
    ,ind(11), ind(12), ind(13), ind(14), ind(15),ind(16), ind(17), ind(18), ind(19), ind(20)...
    ,ind(21), ind(22), ind(23), ind(24), ind(25),ind(26), ind(27), ind(28), ind(29), ind(30)) + mu_3*randn(1,1)/sqrt((d_TT-2)*8+2*4-4) ;
[y,Jyl,Jyr,ilocl,ilocr,evalcnt,Error_final]=greedy2_cross_Version_ZhenQin1(n_TT, fun, 1e-15, nswp, Length_r_max, []);


MSE2(6,ii_11)=Error_final;
end

%% Given a full tensor %Full tensor %35-order

for ii_11=1:NumberofIterations
     
%
n_TT = 2*ones(1,35);
d_TT = 35;
r_TT = [1,2*ones(1,35-1),1];
A=tt_random(n_TT,d_TT,r_TT);


nswp=100; % Maximum Number of iterations
Length_r_max=Length_r_max_design;% Estimated rank =Length_r_max-1
%

fun = @(ind) A(ind(1), ind(2), ind(3), ind(4), ind(5),ind(6), ind(7), ind(8), ind(9), ind(10)...
    ,ind(11), ind(12), ind(13), ind(14), ind(15),ind(16), ind(17), ind(18), ind(19), ind(20)...
    ,ind(21), ind(22), ind(23), ind(24), ind(25),ind(26), ind(27), ind(28), ind(29), ind(30)...
    ,ind(31), ind(32), ind(33), ind(34), ind(35)) + mu_3*randn(1,1)/sqrt((d_TT-2)*8+2*4-4) ;
[y,Jyl,Jyr,ilocl,ilocr,evalcnt,Error_final]=greedy2_cross_Version_ZhenQin1(n_TT, fun, 1e-15, nswp, Length_r_max, []);


MSE2(7,ii_11)=Error_final;
end

%% Given a full tensor %Full tensor %40-order

for ii_11=1:NumberofIterations
     
%
n_TT = 2*ones(1,40);
d_TT = 40;
r_TT = [1,2*ones(1,40-1),1];
A=tt_random(n_TT,d_TT,r_TT);


nswp=100; % Maximum Number of iterations
Length_r_max=Length_r_max_design;% Estimated rank =Length_r_max-1
%

fun = @(ind) A(ind(1), ind(2), ind(3), ind(4), ind(5),ind(6), ind(7), ind(8), ind(9), ind(10)...
    ,ind(11), ind(12), ind(13), ind(14), ind(15),ind(16), ind(17), ind(18), ind(19), ind(20)...
    ,ind(21), ind(22), ind(23), ind(24), ind(25),ind(26), ind(27), ind(28), ind(29), ind(30)...
    ,ind(31), ind(32), ind(33), ind(34), ind(35),ind(36), ind(37), ind(38), ind(39), ind(40)) + mu_3*randn(1,1)/sqrt((d_TT-2)*8+2*4-4) ;
[y,Jyl,Jyr,ilocl,ilocr,evalcnt,Error_final]=greedy2_cross_Version_ZhenQin1(n_TT, fun, 1e-15, nswp, Length_r_max, []);


MSE2(8,ii_11)=Error_final;
end

%% Given a full tensor %Full tensor %45-order

for ii_11=1:NumberofIterations
     
%
n_TT = 2*ones(1,45);
d_TT = 45;
r_TT = [1,2*ones(1,45-1),1];
A=tt_random(n_TT,d_TT,r_TT);


nswp=100; % Maximum Number of iterations
Length_r_max=Length_r_max_design;% Estimated rank =Length_r_max-1
%

fun = @(ind) A(ind(1), ind(2), ind(3), ind(4), ind(5),ind(6), ind(7), ind(8), ind(9), ind(10)...
    ,ind(11), ind(12), ind(13), ind(14), ind(15),ind(16), ind(17), ind(18), ind(19), ind(20)...
    ,ind(21), ind(22), ind(23), ind(24), ind(25),ind(26), ind(27), ind(28), ind(29), ind(30)...
    ,ind(31), ind(32), ind(33), ind(34), ind(35),ind(36), ind(37), ind(38), ind(39), ind(40)...
    ,ind(41), ind(42), ind(43), ind(44), ind(45)) + mu_3*randn(1,1)/sqrt((d_TT-2)*8+2*4-4) ;
[y,Jyl,Jyr,ilocl,ilocr,evalcnt,Error_final]=greedy2_cross_Version_ZhenQin1(n_TT, fun, 1e-15, nswp, Length_r_max, []);


MSE2(9,ii_11)=Error_final;
end


%% Given a full tensor %Full tensor %50-order

for ii_11=1:NumberofIterations
     
%
n_TT = 2*ones(1,50);
d_TT = 50;
r_TT = [1,2*ones(1,50-1),1];
A=tt_random(n_TT,d_TT,r_TT);


nswp=100; % Maximum Number of iterations
Length_r_max=Length_r_max_design;% Estimated rank =Length_r_max-1
%

fun = @(ind) A(ind(1), ind(2), ind(3), ind(4), ind(5),ind(6), ind(7), ind(8), ind(9), ind(10)...
    ,ind(11), ind(12), ind(13), ind(14), ind(15),ind(16), ind(17), ind(18), ind(19), ind(20)...
    ,ind(21), ind(22), ind(23), ind(24), ind(25),ind(26), ind(27), ind(28), ind(29), ind(30)...
    ,ind(31), ind(32), ind(33), ind(34), ind(35),ind(36), ind(37), ind(38), ind(39), ind(40)...
    ,ind(41), ind(42), ind(43), ind(44), ind(45),ind(46), ind(47), ind(48), ind(49), ind(50)) + mu_3*randn(1,1)/sqrt((d_TT-2)*8+2*4-4) ;
[y,Jyl,Jyr,ilocl,ilocr,evalcnt,Error_final]=greedy2_cross_Version_ZhenQin1(n_TT, fun, 1e-15, nswp, Length_r_max, []);


MSE2(10,ii_11)=Error_final;
end


NumberofIterations_1=NumberofIterations*ones(10,1);
NumberofIterations_2=NumberofIterations*ones(10,1);
NumberofIterations_3=NumberofIterations*ones(10,1);
for i=1:NumberofIterations
    for j=1:10
        if MSE(j,i)>1
            MSE(j,i)=0;
            NumberofIterations_1(j) = NumberofIterations_1(j)-1;
        end
        if MSE1(j,i)>1
            MSE1(j,i)=0;
            NumberofIterations_2(j) = NumberofIterations_2(j)-1;
        end
        if MSE2(j,i)>1
            MSE2(j,i)=0;
            NumberofIterations_3(j) = NumberofIterations_3(j)-1;
        end
    end
end
        


MSE_avg=sum(MSE,2)./NumberofIterations_1;
MSE1_avg=sum(MSE1,2)./NumberofIterations_2;
MSE2_avg=sum(MSE2,2)./NumberofIterations_3;

MSE_log=10*log10(MSE_avg);
MSE1_log=10*log10(MSE1_avg);
MSE2_log=10*log10(MSE2_avg);

figure(1)
X=5:5:50;
A=plot(X,MSE_log,'-kh',X,MSE1_log,'-r*',X,MSE2_log,'-bs');
set(A,'LineWidth',2);
legend('\mu=10^{-5}','\mu=10^{-4}','\mu=10^{-3}',...
    'FontSize',12,'FontName', 'Times New Roman','Interpreter','LaTex')
xlabel('$N$','FontSize',12,'FontName', 'Times New Roman','Interpreter','LaTex')
ylabel('MSE (dB) ')
grid on;
