# Supplementary material
Source: ML conference proceedings conference paper supplement (https://proceedings.neurips.cc/paper_files/paper/2022/hash/5bd9fbb3a5a985f80c16ddd0ec1dfc43-Abstract.html)
Supplement: Supplementary file 1 [file 5bd9fbb3a5a985f80c16ddd0ec1dfc43-Supplemental-Conference.zip › Tensor_differentRank_tau_Nips22.m]

clc;
clear all;
close all;

NumberofIterations=100;
eta_set=1e-5;
mu_set=1e-5;
Tau_design=1e-7;
%Length_r_max_design=3;


%% Given a full tensor %Full tensor %10-order

% r'=r

for ii_11=1:NumberofIterations
%
for r_incoherent = 1:7
n_TT = [2, 2, 2, 2, 2, 2, 2, 2,2,2];%the unmber of n_TT equals to d_TT
d_TT=10;
if r_incoherent==1
    r_TT=[1,2,2,2,2,2,2,2,2,2,1];
elseif r_incoherent==2
    r_TT=[1,3,3,3,3,3,3,3,3,3,1];
elseif r_incoherent==3
    r_TT=[1,4,4,4,4,4,4,4,4,4,1];
elseif r_incoherent==4
    r_TT=[1,5,5,5,5,5,5,5,5,5,1];
elseif r_incoherent==5
    r_TT=[1,6,6,6,6,6,6,6,6,6,1];
elseif r_incoherent==6
    r_TT=[1,7,7,7,7,7,7,7,7,7,1];
elseif r_incoherent==7
    r_TT=[1,8,8,8,8,8,8,8,8,8,1];
end
A_low_rank_TT_Tensor=tt_random(n_TT,d_TT,r_TT);
A_low_rank_TT_Tensor_vector=full(A_low_rank_TT_Tensor);
A=reshape(A_low_rank_TT_Tensor_vector,n_TT); %From TT-Tensor to original Tensor
B=reshape(A,[2,2^(d_TT-1)]);
B_value=norm(B,'fro');
A=A/B_value;
%
LowRankError_Tensor=randn(2, 2, 2, 2, 2, 2,2,2,2,2);
C=reshape(LowRankError_Tensor,[2,2^(d_TT-1)]);
C_value=norm(C,'fro');
LowRankError_Tensor=LowRankError_Tensor/C_value;
%
MeasurementError_Tensor=zeros(n_TT);
for i_1=1:n_TT(1);
for i_2=1:n_TT(2);
for i_3=1:n_TT(3);
for i_4=1:n_TT(4);
for i_5=1:n_TT(5);
for i_6=1:n_TT(6);
for i_7=1:n_TT(7);  
for i_8=1:n_TT(8);   
for i_9=1:n_TT(9);  
for i_10=1:n_TT(10);  
    MeasurementError_Tensor(i_1,i_2,i_3,i_4,i_5,i_6,i_7,i_8,i_9,i_10)=mu_set*randn(1,1)/sqrt((d_TT-6)*2*(8)^2+2*2*4*8+2*2*2*4+2*2*2-2^2);
% if r_incoherent==1
%     MeasurementError_Tensor(i_1,i_2,i_3,i_4,i_5,i_6,i_7,i_8,i_9,i_10)=mu_set*randn(1,1)/sqrt((d_TT-2)*2*2^2+2*2*2-2^2);
% elseif r_incoherent==2
%     MeasurementError_Tensor(i_1,i_2,i_3,i_4,i_5,i_6,i_7,i_8,i_9,i_10)=mu_set*randn(1,1)/sqrt((d_TT-4)*2*(r_incoherent+1)^2+2*2*2*3+2*2*2-2^2);
% elseif r_incoherent==3
%     MeasurementError_Tensor(i_1,i_2,i_3,i_4,i_5,i_6,i_7,i_8,i_9,i_10)=mu_set*randn(1,1)/sqrt((d_TT-4)*2*(r_incoherent+1)^2+2*2*2*4+2*2*2-2^2);
% elseif r_incoherent==4
%     MeasurementError_Tensor(i_1,i_2,i_3,i_4,i_5,i_6,i_7,i_8,i_9,i_10)=mu_set*randn(1,1)/sqrt((d_TT-6)*2*(r_incoherent+1)^2+2*2*4*5+2*2*2*4+2*2*2-2^2);
% elseif r_incoherent==5
%     MeasurementError_Tensor(i_1,i_2,i_3,i_4,i_5,i_6,i_7,i_8,i_9,i_10)=mu_set*randn(1,1)/sqrt((d_TT-6)*2*(r_incoherent+1)^2+2*2*4*6+2*2*2*4+2*2*2-2^2);
% elseif r_incoherent==6
%     MeasurementError_Tensor(i_1,i_2,i_3,i_4,i_5,i_6,i_7,i_8,i_9,i_10)=mu_set*randn(1,1)/sqrt((d_TT-6)*2*(r_incoherent+1)^2+2*2*4*7+2*2*2*4+2*2*2-2^2);
% elseif r_incoherent==7
%     MeasurementError_Tensor(i_1,i_2,i_3,i_4,i_5,i_6,i_7,i_8,i_9,i_10)=mu_set*randn(1,1)/sqrt((d_TT-6)*2*(r_incoherent+1)^2+2*2*4*8+2*2*2*4+2*2*2-2^2);
% end    
    
end
end
end
end
end
end
end
end
end
end
%

nswp=100; % Maximum Number of iterations
eta=eta_set;
Length_r_max=9;% Estimated rank =Length_r_max-1

%
B=A+eta*LowRankError_Tensor;
C=B+MeasurementError_Tensor;
fun = @(ind) C(ind(1), ind(2), ind(3), ind(4), ind(5), ind(6), ind(7), ind(8), ind(9), ind(10) );
[y,Jyl,Jyr,ilocl,ilocr,evalcnt,Error_final]=greedy2_cross_Version_ZhenQin1(n_TT, fun, 1e-15, nswp, Length_r_max, []);

% Using Tau to truncate the diagonal matrix of SVD
tau=0;
tau1=Tau_design;
r_Length=zeros(length(ilocl)-2,1);
for iii=1:length(ilocl)-2
    r_Length(iii)=length(ilocl{iii+1});
end
Tensor=C;

[Y]=AddingTau(ilocl,ilocr,Tensor,n_TT,r_Length,tau);
[Y1]=AddingTau(ilocl,ilocr,Tensor,n_TT,r_Length,tau1);


MSE_CA_N=0;
MSE_CA_N1=0;
MSE_CA_N2=0;
MSE_CA_D=0;
for i_1=1:n_TT(1);
for i_2=1:n_TT(2);
for i_3=1:n_TT(3);
for i_4=1:n_TT(4);
for i_5=1:n_TT(5);
for i_6=1:n_TT(6);
for i_7=1:n_TT(7);
for i_8=1:n_TT(8);
for i_9=1:n_TT(9);
for i_10=1:n_TT(10);
%
MSE_CA_D=MSE_CA_D+B(i_1,i_2,i_3,i_4,i_5,i_6,i_7,i_8,i_9,i_10)^2;
%
MSE_CA_N=MSE_CA_N+(B(i_1,i_2,i_3,i_4,i_5,i_6,i_7,i_8,i_9,i_10)-Y{1}(i_1,:)*reshape(Y{2}(:,i_2,:),[r_Length(1),r_Length(2)])*...
reshape(Y{3}(:,i_3,:),[r_Length(2),r_Length(3)])*reshape(Y{4}(:,i_4,:),[r_Length(3),r_Length(4)])*...
reshape(Y{5}(:,i_5,:),[r_Length(4),r_Length(5)])*reshape(Y{6}(:,i_6,:),[r_Length(5),r_Length(6)])*...
reshape(Y{7}(:,i_7,:),[r_Length(6),r_Length(7)])*reshape(Y{8}(:,i_8,:),[r_Length(7),r_Length(8)])*...
reshape(Y{9}(:,i_9,:),[r_Length(8),r_Length(9)])*Y{10}(:,i_10))^2;
%
MSE_CA_N1=MSE_CA_N1+(B(i_1,i_2,i_3,i_4,i_5,i_6,i_7,i_8,i_9,i_10)-Y1{1}(i_1,:)*reshape(Y1{2}(:,i_2,:),[r_Length(1),r_Length(2)])*...
reshape(Y1{3}(:,i_3,:),[r_Length(2),r_Length(3)])*reshape(Y1{4}(:,i_4,:),[r_Length(3),r_Length(4)])*...
reshape(Y1{5}(:,i_5,:),[r_Length(4),r_Length(5)])*reshape(Y1{6}(:,i_6,:),[r_Length(5),r_Length(6)])*...
reshape(Y1{7}(:,i_7,:),[r_Length(6),r_Length(7)])*reshape(Y1{8}(:,i_8,:),[r_Length(7),r_Length(8)])*...
reshape(Y1{9}(:,i_9,:),[r_Length(8),r_Length(9)])*Y1{10}(:,i_10))^2;
end
end
end
end
end
end
end
end
end
end

MSE(r_incoherent,ii_11)=MSE_CA_N/MSE_CA_D;
MSE1(r_incoherent,ii_11)=MSE_CA_N1/MSE_CA_D;


end
end

%% Given a full tensor %Full tensor %10-order

% r'=r+1

for ii_11=1:NumberofIterations
%
for r_incoherent = 1:7
n_TT = [2, 2, 2, 2, 2, 2, 2, 2,2,2];%the unmber of n_TT equals to d_TT
d_TT=10;
if r_incoherent==1
    r_TT=[1,2,2,2,2,2,2,2,2,2,1];
elseif r_incoherent==2
    r_TT=[1,3,3,3,3,3,3,3,3,3,1];
elseif r_incoherent==3
    r_TT=[1,4,4,4,4,4,4,4,4,4,1];
elseif r_incoherent==4
    r_TT=[1,5,5,5,5,5,5,5,5,5,1];
elseif r_incoherent==5
    r_TT=[1,6,6,6,6,6,6,6,6,6,1];
elseif r_incoherent==6
    r_TT=[1,7,7,7,7,7,7,7,7,7,1];
elseif r_incoherent==7
    r_TT=[1,8,8,8,8,8,8,8,8,8,1];
end
A_low_rank_TT_Tensor=tt_random(n_TT,d_TT,r_TT);
A_low_rank_TT_Tensor_vector=full(A_low_rank_TT_Tensor);
A=reshape(A_low_rank_TT_Tensor_vector,n_TT); %From TT-Tensor to original Tensor
B=reshape(A,[2,2^(d_TT-1)]);
B_value=norm(B,'fro');
A=A/B_value;
%
LowRankError_Tensor=randn(2, 2, 2, 2, 2, 2,2,2,2,2);
C=reshape(LowRankError_Tensor,[2,2^(d_TT-1)]);
C_value=norm(C,'fro');
LowRankError_Tensor=LowRankError_Tensor/C_value;
%
MeasurementError_Tensor=zeros(n_TT);
for i_1=1:n_TT(1);
for i_2=1:n_TT(2);
for i_3=1:n_TT(3);
for i_4=1:n_TT(4);
for i_5=1:n_TT(5);
for i_6=1:n_TT(6);
for i_7=1:n_TT(7);  
for i_8=1:n_TT(8);   
for i_9=1:n_TT(9);  
for i_10=1:n_TT(10);  
    MeasurementError_Tensor(i_1,i_2,i_3,i_4,i_5,i_6,i_7,i_8,i_9,i_10)=mu_set*randn(1,1)/sqrt((d_TT-8)*2*(9)^2+2*2*8*9+2*2*4*8+2*2*2*4+2*2*2-2^2);
% if r_incoherent==1
%     MeasurementError_Tensor(i_1,i_2,i_3,i_4,i_5,i_6,i_7,i_8,i_9,i_10)=mu_set*randn(1,1)/sqrt((d_TT-4)*2*(r_incoherent+2)^2+2*2*2*3+2*2*2-2^2);
% elseif r_incoherent==2
%     MeasurementError_Tensor(i_1,i_2,i_3,i_4,i_5,i_6,i_7,i_8,i_9,i_10)=mu_set*randn(1,1)/sqrt((d_TT-4)*2*(r_incoherent+2)^2+2*2*2*4+2*2*2-2^2);
% elseif r_incoherent==3
%     MeasurementError_Tensor(i_1,i_2,i_3,i_4,i_5,i_6,i_7,i_8,i_9,i_10)=mu_set*randn(1,1)/sqrt((d_TT-6)*2*(r_incoherent+2)^2+2*2*4*5+2*2*2*4+2*2*2-2^2);
% elseif r_incoherent==4
%     MeasurementError_Tensor(i_1,i_2,i_3,i_4,i_5,i_6,i_7,i_8,i_9,i_10)=mu_set*randn(1,1)/sqrt((d_TT-6)*2*(r_incoherent+2)^2+2*2*4*6+2*2*2*4+2*2*2-2^2);
% elseif r_incoherent==5
%     MeasurementError_Tensor(i_1,i_2,i_3,i_4,i_5,i_6,i_7,i_8,i_9,i_10)=mu_set*randn(1,1)/sqrt((d_TT-6)*2*(r_incoherent+2)^2+2*2*4*7+2*2*2*4+2*2*2-2^2);
% elseif r_incoherent==6
%     MeasurementError_Tensor(i_1,i_2,i_3,i_4,i_5,i_6,i_7,i_8,i_9,i_10)=mu_set*randn(1,1)/sqrt((d_TT-6)*2*(r_incoherent+2)^2+2*2*4*8+2*2*2*4+2*2*2-2^2);
% elseif r_incoherent==7
%     MeasurementError_Tensor(i_1,i_2,i_3,i_4,i_5,i_6,i_7,i_8,i_9,i_10)=mu_set*randn(1,1)/sqrt((d_TT-8)*2*(r_incoherent+2)^2+2*2*8*9+2*2*4*8+2*2*2*4+2*2*2-2^2);
% end    

end
end
end
end
end
end
end
end
end
end
%

nswp=100; % Maximum Number of iterations
eta=eta_set;
Length_r_max=10;% Estimated rank =Length_r_max-1

%
B=A+eta*LowRankError_Tensor;
C=B+MeasurementError_Tensor;
fun = @(ind) C(ind(1), ind(2), ind(3), ind(4), ind(5), ind(6), ind(7), ind(8), ind(9), ind(10) );
[y,Jyl,Jyr,ilocl,ilocr,evalcnt,Error_final]=greedy2_cross_Version_ZhenQin1(n_TT, fun, 1e-15, nswp, Length_r_max, []);

% Using Tau to truncate the diagonal matrix of SVD
tau=0;
tau1=Tau_design;
r_Length=zeros(length(ilocl)-2,1);
for iii=1:length(ilocl)-2
    r_Length(iii)=length(ilocl{iii+1});
end
Tensor=C;

[Y]=AddingTau(ilocl,ilocr,Tensor,n_TT,r_Length,tau);
[Y1]=AddingTau(ilocl,ilocr,Tensor,n_TT,r_Length,tau1);


MSE_CA_N=0;
MSE_CA_N1=0;
MSE_CA_N2=0;
MSE_CA_D=0;
for i_1=1:n_TT(1);
for i_2=1:n_TT(2);
for i_3=1:n_TT(3);
for i_4=1:n_TT(4);
for i_5=1:n_TT(5);
for i_6=1:n_TT(6);
for i_7=1:n_TT(7);
for i_8=1:n_TT(8);
for i_9=1:n_TT(9);
for i_10=1:n_TT(10);
%
MSE_CA_D=MSE_CA_D+B(i_1,i_2,i_3,i_4,i_5,i_6,i_7,i_8,i_9,i_10)^2;
%
MSE_CA_N=MSE_CA_N+(B(i_1,i_2,i_3,i_4,i_5,i_6,i_7,i_8,i_9,i_10)-Y{1}(i_1,:)*reshape(Y{2}(:,i_2,:),[r_Length(1),r_Length(2)])*...
reshape(Y{3}(:,i_3,:),[r_Length(2),r_Length(3)])*reshape(Y{4}(:,i_4,:),[r_Length(3),r_Length(4)])*...
reshape(Y{5}(:,i_5,:),[r_Length(4),r_Length(5)])*reshape(Y{6}(:,i_6,:),[r_Length(5),r_Length(6)])*...
reshape(Y{7}(:,i_7,:),[r_Length(6),r_Length(7)])*reshape(Y{8}(:,i_8,:),[r_Length(7),r_Length(8)])*...
reshape(Y{9}(:,i_9,:),[r_Length(8),r_Length(9)])*Y{10}(:,i_10))^2;
%
MSE_CA_N1=MSE_CA_N1+(B(i_1,i_2,i_3,i_4,i_5,i_6,i_7,i_8,i_9,i_10)-Y1{1}(i_1,:)*reshape(Y1{2}(:,i_2,:),[r_Length(1),r_Length(2)])*...
reshape(Y1{3}(:,i_3,:),[r_Length(2),r_Length(3)])*reshape(Y1{4}(:,i_4,:),[r_Length(3),r_Length(4)])*...
reshape(Y1{5}(:,i_5,:),[r_Length(4),r_Length(5)])*reshape(Y1{6}(:,i_6,:),[r_Length(5),r_Length(6)])*...
reshape(Y1{7}(:,i_7,:),[r_Length(6),r_Length(7)])*reshape(Y1{8}(:,i_8,:),[r_Length(7),r_Length(8)])*...
reshape(Y1{9}(:,i_9,:),[r_Length(8),r_Length(9)])*Y1{10}(:,i_10))^2;
end
end
end
end
end
end
end
end
end
end

MSE2(r_incoherent,ii_11)=MSE_CA_N/MSE_CA_D;
MSE3(r_incoherent,ii_11)=MSE_CA_N1/MSE_CA_D;


end
end

%% Given a full tensor %Full tensor %10-order

% r'=r+2

for ii_11=1:NumberofIterations
%
for r_incoherent = 1:7
n_TT = [2, 2, 2, 2, 2, 2, 2, 2,2,2];%the unmber of n_TT equals to d_TT
d_TT=10;
if r_incoherent==1
    r_TT=[1,2,2,2,2,2,2,2,2,2,1];
elseif r_incoherent==2
    r_TT=[1,3,3,3,3,3,3,3,3,3,1];
elseif r_incoherent==3
    r_TT=[1,4,4,4,4,4,4,4,4,4,1];
elseif r_incoherent==4
    r_TT=[1,5,5,5,5,5,5,5,5,5,1];
elseif r_incoherent==5
    r_TT=[1,6,6,6,6,6,6,6,6,6,1];
elseif r_incoherent==6
    r_TT=[1,7,7,7,7,7,7,7,7,7,1];
elseif r_incoherent==7
    r_TT=[1,8,8,8,8,8,8,8,8,8,1];
end
A_low_rank_TT_Tensor=tt_random(n_TT,d_TT,r_TT);
A_low_rank_TT_Tensor_vector=full(A_low_rank_TT_Tensor);
A=reshape(A_low_rank_TT_Tensor_vector,n_TT); %From TT-Tensor to original Tensor
B=reshape(A,[2,2^(d_TT-1)]);
B_value=norm(B,'fro');
A=A/B_value;
%
LowRankError_Tensor=randn(2, 2, 2, 2, 2, 2,2,2,2,2);
C=reshape(LowRankError_Tensor,[2,2^(d_TT-1)]);
C_value=norm(C,'fro');
LowRankError_Tensor=LowRankError_Tensor/C_value;
%
MeasurementError_Tensor=zeros(n_TT);
for i_1=1:n_TT(1);
for i_2=1:n_TT(2);
for i_3=1:n_TT(3);
for i_4=1:n_TT(4);
for i_5=1:n_TT(5);
for i_6=1:n_TT(6);
for i_7=1:n_TT(7);  
for i_8=1:n_TT(8);   
for i_9=1:n_TT(9);  
for i_10=1:n_TT(10);  
    MeasurementError_Tensor(i_1,i_2,i_3,i_4,i_5,i_6,i_7,i_8,i_9,i_10)=mu_set*randn(1,1)/sqrt((d_TT-8)*2*(10)^2+2*2*8*10+2*2*4*8+2*2*2*4+2*2*2-2^2);
% if r_incoherent==1
%     MeasurementError_Tensor(i_1,i_2,i_3,i_4,i_5,i_6,i_7,i_8,i_9,i_10)=mu_set*randn(1,1)/sqrt((d_TT-4)*2*(r_incoherent+3)^2+2*2*2*4+2*2*2-2^2);
% elseif r_incoherent==2
%     MeasurementError_Tensor(i_1,i_2,i_3,i_4,i_5,i_6,i_7,i_8,i_9,i_10)=mu_set*randn(1,1)/sqrt((d_TT-6)*2*(r_incoherent+3)^2+2*2*4*5+2*2*2*4+2*2*2-2^2);
% elseif r_incoherent==3
%     MeasurementError_Tensor(i_1,i_2,i_3,i_4,i_5,i_6,i_7,i_8,i_9,i_10)=mu_set*randn(1,1)/sqrt((d_TT-6)*2*(r_incoherent+3)^2+2*2*4*6+2*2*2*4+2*2*2-2^2);
% elseif r_incoherent==4
%     MeasurementError_Tensor(i_1,i_2,i_3,i_4,i_5,i_6,i_7,i_8,i_9,i_10)=mu_set*randn(1,1)/sqrt((d_TT-6)*2*(r_incoherent+3)^2+2*2*4*7+2*2*2*4+2*2*2-2^2);
% elseif r_incoherent==5
%     MeasurementError_Tensor(i_1,i_2,i_3,i_4,i_5,i_6,i_7,i_8,i_9,i_10)=mu_set*randn(1,1)/sqrt((d_TT-6)*2*(r_incoherent+3)^2+2*2*4*8+2*2*2*4+2*2*2-2^2);
% elseif r_incoherent==6
%     MeasurementError_Tensor(i_1,i_2,i_3,i_4,i_5,i_6,i_7,i_8,i_9,i_10)=mu_set*randn(1,1)/sqrt((d_TT-8)*2*(r_incoherent+3)^2+2*2*8*9+2*2*4*8+2*2*2*4+2*2*2-2^2);
% elseif r_incoherent==7
%     MeasurementError_Tensor(i_1,i_2,i_3,i_4,i_5,i_6,i_7,i_8,i_9,i_10)=mu_set*randn(1,1)/sqrt((d_TT-8)*2*(r_incoherent+3)^2+2*2*8*10+2*2*4*8+2*2*2*4+2*2*2-2^2);
% end     

end
end
end
end
end
end
end
end
end
end
%

nswp=100; % Maximum Number of iterations
eta=eta_set;
Length_r_max=11;% Estimated rank =Length_r_max-1

%
B=A+eta*LowRankError_Tensor;
C=B+MeasurementError_Tensor;
fun = @(ind) C(ind(1), ind(2), ind(3), ind(4), ind(5), ind(6), ind(7), ind(8), ind(9), ind(10) );
[y,Jyl,Jyr,ilocl,ilocr,evalcnt,Error_final]=greedy2_cross_Version_ZhenQin1(n_TT, fun, 1e-15, nswp, Length_r_max, []);

% Using Tau to truncate the diagonal matrix of SVD
tau=0;
tau1=Tau_design;
r_Length=zeros(length(ilocl)-2,1);
for iii=1:length(ilocl)-2
    r_Length(iii)=length(ilocl{iii+1});
end
Tensor=C;

[Y]=AddingTau(ilocl,ilocr,Tensor,n_TT,r_Length,tau);
[Y1]=AddingTau(ilocl,ilocr,Tensor,n_TT,r_Length,tau1);


MSE_CA_N=0;
MSE_CA_N1=0;
MSE_CA_N2=0;
MSE_CA_D=0;
for i_1=1:n_TT(1);
for i_2=1:n_TT(2);
for i_3=1:n_TT(3);
for i_4=1:n_TT(4);
for i_5=1:n_TT(5);
for i_6=1:n_TT(6);
for i_7=1:n_TT(7);
for i_8=1:n_TT(8);
for i_9=1:n_TT(9);
for i_10=1:n_TT(10);
%
MSE_CA_D=MSE_CA_D+B(i_1,i_2,i_3,i_4,i_5,i_6,i_7,i_8,i_9,i_10)^2;
%
MSE_CA_N=MSE_CA_N+(B(i_1,i_2,i_3,i_4,i_5,i_6,i_7,i_8,i_9,i_10)-Y{1}(i_1,:)*reshape(Y{2}(:,i_2,:),[r_Length(1),r_Length(2)])*...
reshape(Y{3}(:,i_3,:),[r_Length(2),r_Length(3)])*reshape(Y{4}(:,i_4,:),[r_Length(3),r_Length(4)])*...
reshape(Y{5}(:,i_5,:),[r_Length(4),r_Length(5)])*reshape(Y{6}(:,i_6,:),[r_Length(5),r_Length(6)])*...
reshape(Y{7}(:,i_7,:),[r_Length(6),r_Length(7)])*reshape(Y{8}(:,i_8,:),[r_Length(7),r_Length(8)])*...
reshape(Y{9}(:,i_9,:),[r_Length(8),r_Length(9)])*Y{10}(:,i_10))^2;
%
MSE_CA_N1=MSE_CA_N1+(B(i_1,i_2,i_3,i_4,i_5,i_6,i_7,i_8,i_9,i_10)-Y1{1}(i_1,:)*reshape(Y1{2}(:,i_2,:),[r_Length(1),r_Length(2)])*...
reshape(Y1{3}(:,i_3,:),[r_Length(2),r_Length(3)])*reshape(Y1{4}(:,i_4,:),[r_Length(3),r_Length(4)])*...
reshape(Y1{5}(:,i_5,:),[r_Length(4),r_Length(5)])*reshape(Y1{6}(:,i_6,:),[r_Length(5),r_Length(6)])*...
reshape(Y1{7}(:,i_7,:),[r_Length(6),r_Length(7)])*reshape(Y1{8}(:,i_8,:),[r_Length(7),r_Length(8)])*...
reshape(Y1{9}(:,i_9,:),[r_Length(8),r_Length(9)])*Y1{10}(:,i_10))^2;
end
end
end
end
end
end
end
end
end
end

MSE4(r_incoherent,ii_11)=MSE_CA_N/MSE_CA_D;
MSE5(r_incoherent,ii_11)=MSE_CA_N1/MSE_CA_D;


end
end

%%


MSE_average_CUR_advance=sum(MSE,2)./NumberofIterations;
MSE_tau_average_CUR_advance=sum(MSE1,2)./NumberofIterations;
MSE_average_CUR_advance1=sum(MSE2,2)./NumberofIterations;
MSE_tau_average_CUR_advance1=sum(MSE3,2)./NumberofIterations;
MSE_average_CUR_advance2=sum(MSE4,2)./NumberofIterations;
MSE_tau_average_CUR_advance2=sum(MSE5,2)./NumberofIterations;


MSE_average_CUR=10*log10(MSE_average_CUR_advance);
MSE_tau_average_CUR=10*log10(MSE_tau_average_CUR_advance);
MSE_average_CUR1=10*log10(MSE_average_CUR_advance1);
MSE_tau_average_CUR1=10*log10(MSE_tau_average_CUR_advance1);
MSE_average_CUR2=10*log10(MSE_average_CUR_advance2);
MSE_tau_average_CUR2=10*log10(MSE_tau_average_CUR_advance2);


figure(1)
X=2:1:8;
A_1=plot(X,MSE_average_CUR,'-kh',X,MSE_tau_average_CUR,'-b*',X,MSE_average_CUR1,'-.kh',X,MSE_tau_average_CUR1,'-.b*',X,MSE_average_CUR2,':kh',X,MSE_tau_average_CUR2,':b*');
set(A_1,'LineWidth',2);
legend('\tau=0, r=8','\tau=10^{-7}, r=8','\tau=0, r=9','\tau=10^{-7}, r=9','\tau=0, r=r+10','\tau=10^{-7}, r=10')
xlabel('$r$ ','FontSize',12,'FontName', 'Times New Roman','Interpreter','LaTex')
%xlabel('$l_{\rm max}$','FontSize',12,'FontName', 'Times New Roman','Interpreter','LaTex');
ylabel('MSE (dB)')
grid on;


%load Nips_MSE_different_Rank.mat

figure(2)
X=2:1:8;
A_1=plot(X,MSE_tau_average_CUR,'-k*',X,MSE_tau_average_CUR1,'-bs',X,MSE_tau_average_CUR2,'-r^');
set(A_1,'LineWidth',2);
legend(' r=8','r=9','r=10')
xlabel('$r$ ','FontSize',12,'FontName', 'Times New Roman','Interpreter','LaTex')
%xlabel('$l_{\rm max}$','FontSize',12,'FontName', 'Times New Roman','Interpreter','LaTex');
ylabel('MSE (dB)')
grid on;
